# Supplementary material for: Factors associated with breastfeeding in England: an analysis by primary care trust
Source: HighWire-hosted journal article supplement (doi:10.1136/bmjopen-2013-002765), 2013-01-01
Supplement: bmjopen-2013-002765supp_tables.pdf [file bmjopen-2013-002765supp_tables.pdf]

## Supplementary tables

**Table S1. Breastfeeding outcomes by socio-demographic variables**

|                                      | % INITIATING<br>BREASTFEEDING AT BIRTH |            | % ANY BREASTFEEDING<br>AT 6-8 WEEKS |            | % EXCLUSIVE<br>BREASTFEEDING AT 6-8<br>WEEKS |            |
|--------------------------------------|----------------------------------------|------------|-------------------------------------|------------|----------------------------------------------|------------|
|                                      | mean (sd)                              | min,max    | mean (sd)                           | min,max    | mean (sd)                                    | min,max    |
| <b>Index of Multiple Deprivation</b> |                                        |            |                                     |            |                                              |            |
| Quintile 1 (least deprived)          | 77.8 (5.5)                             | 67.7, 91.5 | 52.7 (9)                            | 38.8, 72.1 | 37.8 (5.9)                                   | 28.8, 49.9 |
| Quintile 2                           | 73.5 (6.2)                             | 60.8, 91.2 | 44.7 (9.1)                          | 33.3, 72.8 | 32.2 (5)                                     | 23.3, 42.9 |
| Quintile 3                           | 72.8 (11.5)                            | 52.2, 92.2 | 44.7 (16.2)                         | 25.2, 83.1 | 31.5 (9.6)                                   | 18.2, 57.5 |
| Quintile 4                           | 67.2 (12.4)                            | 48.6, 91.9 | 40.4 (17.6)                         | 19.2, 82.2 | 28.4 (10.5)                                  | 14.3, 58.2 |
| Quintile 5 (most deprived)           | 69.6 (15.1)                            | 39, 92.9   | 44.2 (18.5)                         | 19.2, 80.1 | 28.3 (9.9)                                   | 15.9, 50   |
| <b>% mothers aged 35+</b>            |                                        |            |                                     |            |                                              |            |
| <15%                                 | 60.5 (8.2)                             | 39, 73.6   | 31.5 (7.7)                          | 19.2, 50.9 | 23.2 (4.8)                                   | 14.3, 32.8 |
| 15-<20%                              | 69.8 (8)                               | 52.2, 88.9 | 41 (9.3)                            | 23.1, 71.7 | 28.8 (5.6)                                   | 17.2, 42.2 |
| 20-<25%                              | 78.1 (6.2)                             | 67.7, 92.1 | 51.6 (11)                           | 35.2, 80.1 | 35.5 (5.2)                                   | 24.9, 50   |
| ≥25%                                 | 86.5 (5.9)                             | 76, 92.9   | 67.2 (10.5)                         | 50.1, 83.1 | 45.5 (6.6)                                   | 34.7, 58.2 |
| <b>% mothers aged &lt;20</b>         |                                        |            |                                     |            |                                              |            |
| <3%                                  | 87.7 (4.2)                             | 79.9, 92.2 | 70.3 (7.8)                          | 54.8, 83.1 | 44.5 (7.1)                                   | 32.1, 57.5 |
| 3-<6%                                | 76.5 (7.7)                             | 53.4, 92.9 | 50.3 (11.5)                         | 26.7, 80.1 | 34.5 (7.5)                                   | 18.3, 58.2 |
| 6-<8%                                | 68 (7.9)                               | 39, 81.1   | 38.4 (6.9)                          | 19.2, 51.4 | 28.7 (5.1)                                   | 15.9, 38.4 |
| ≥8%                                  | 59.3 (7.2)                             | 45.8, 76.3 | 30.2 (6.8)                          | 19.2, 45.9 | 22.3 (4.6)                                   | 14.3, 32.8 |
| <b>% population BME</b>              |                                        |            |                                     |            |                                              |            |
| <10%                                 | 65.9 (9.8)                             | 39, 81.1   | 35.4 (9)                            | 19.2, 54   | 27.2 (6.9)                                   | 14.3, 42.7 |
| 10-<20%                              | 71.2 (8.1)                             | 47.6, 85.5 | 43.8 (9.5)                          | 24.7, 70.5 | 31.7 (7.7)                                   | 17.9, 58.2 |
| 20-<40%                              | 77.1 (10.2)                            | 56.5, 92.2 | 53.4 (15)                           | 29.5, 82.2 | 33.9 (10.2)                                  | 18.5, 51.5 |
| ≥40%                                 | 87 (6.7)                               | 66.4, 92.9 | 71.3 (6.7)                          | 56.1, 83.1 | 42.5 (7.6)                                   | 32.1, 57.5 |
| <b>% mothers smoking at delivery</b> |                                        |            |                                     |            |                                              |            |
| <10%                                 | 85.6 (5.8)                             | 72.3, 92.9 | 66.7 (9.2)                          | 50.1, 83.1 | 42.4 (6.7)                                   | 31.6, 58.2 |
| 10-<15%                              | 73.4 (5.6)                             | 55, 80.9   | 45.3 (7)                            | 29.9, 61.9 | 31.8 (5.6)                                   | 20.2, 43.8 |
| 15-<20%                              | 67.3 (6.7)                             | 52.2, 79.7 | 37.9 (7)                            | 23.1, 56.1 | 27.7 (5.7)                                   | 17.2, 42.7 |
| >20%                                 | 59.6 (9.1)                             | 39, 81.1   | 30.5 (7.3)                          | 19.2, 44.6 | 23.4 (5)                                     | 14.3, 31   |

**Table S2. Observed and predicted breastfeeding: data for all primary care trusts**

| PRIMARY CARE TRUST              | BREASTFEEDING INITIATION |             |              | ANY BREASTFEEDING AT 6-8 WKS |             |             | EXCL. BREASTFEEDING AT 6-8 WEEKS |           |             |
|---------------------------------|--------------------------|-------------|--------------|------------------------------|-------------|-------------|----------------------------------|-----------|-------------|
|                                 | O                        | P           | SR           | O                            | P           | SR          | O                                | P         | SR          |
| <b>NORTH EAST</b>               |                          |             |              |                              |             |             |                                  |           |             |
| County Durham                   | 56                       | 59.9        | -0.86        | 26.9                         | 28.7        | -0.49       | 20.5                             | 22.5      | -0.63       |
| Darlington                      | 60.2                     | 66.1        | -0.67        | 33.7                         | 33.3        | 0           | 25.1                             | 25.4      | -0.11       |
| Gateshead                       | 67.5                     | 62.9        | 0.7          | 37.9                         | 31.9        | 0.94        | 31.4                             | 24.6      | 1.16        |
| Hartlepool                      | 45.8                     | 49.3        | -0.35        | 19.5                         | 21          | -0.23       | 16.6                             | 17.2      | -0.14       |
| Middlesbrough                   | 47.6                     | 53.6        | -0.81        | 24.7                         | 25.7        | -0.2        | 21.8                             | 19.3      | 0.41        |
| Newcastle                       | 62.4                     | 68.6        | -1.13        | 42.1                         | 40.5        | 0.27        | 32.3                             | 28.8      | 0.67        |
| North Tees                      | 57.7                     | 65.1        | -1.09        | 25.2                         | 32.5        | -1.25       | 20.3                             | 24.6      | -0.83       |
| North Tyneside                  | 60                       | 69          | -1.4         | 34                           | 36.6        | -0.44       | 28.3                             | 27.9      | 0.01        |
| Northumberland                  | 62.5                     | 69          | -1.13        | 35.8                         | 36.5        | -0.16       | 30.8                             | 28.7      | 0.36        |
| Redcar and Cleveland            | 52.7                     | 56.3        | -0.41        | 20.1                         | 25.6        | -0.83       | 16.8                             | 20.2      | -0.58       |
| South Tyneside                  | 52.9                     | 57.9        | -0.61        | 24.8                         | 27.5        | -0.44       | 19.1                             | 21        | -0.36       |
| Sunderland Teaching             | 53.1                     | 59.8        | -1.09        | 24.5                         | 29          | -0.9        | 20.1                             | 22.4      | -0.54       |
| <b>NORTH WEST</b>               |                          |             |              |                              |             |             |                                  |           |             |
| Ashton, Leigh and Wigan         | 56                       | 61.7        | -1.04        | 23.1                         | 30.3        | -1.57       | 17.2                             | 23.8      | -1.59       |
| Blackburn with Darwen           | 72.6                     | 63.7        | 1.27         | 32.9                         | 38.5        | -0.91       | 24.2                             | 25.4      | -0.28       |
| Blackpool                       | 56.8                     | 52.7        | 0.48         | 24.7                         | 24.1        | 0.05        | 19.4                             | 18.9      | 0.02        |
| Bolton                          | 67                       | 64.4        | 0.49         | 33.7                         | 35.6        | -0.44       | 27.8                             | 25.3      | 0.51        |
| Bury                            | 69.2                     | 70.7        | -0.24        | 40.2                         | 40.1        | -0.02       | 30.5                             | 29.1      | 0.2         |
| Central and Eastern Cheshire    | 67.7                     | 74          | -1.44        | 38.8                         | 44.6        | -1.37       | 28.8                             | 33.7      | -1.24       |
| Central Lancashire              | 66.9                     | 69.5        | -0.61        | 33.9                         | 37.9        | -0.98       | 23.9                             | 28.2      | -1.17       |
| Cumbria                         | 67.7                     | 67.1        | 0.13         | 28.6                         | 33.9        | -1.13       | 21.4                             | 26.4      | -1.17       |
| East Lancashire                 | 68.3                     | 63.9        | 0.91         | 35.7                         | 34.5        | 0.22        | 27.1                             | 25        | 0.47        |
| Halton and St Helens            | 48.6                     | 59.3        | -1.9         | 19.2                         | 28          | -1.89       | 14.3                             | 22.2      | -1.89       |
| Heywood, Middleton and Rochdale | 60.6                     | 58.8        | 0.29         | 39.2                         | 31.4        | 1.39        | 24.7                             | 22.3      | 0.45        |
| Knowsley                        | 39                       | 52.8        | -1.76        | 19.2                         | 23.5        | -0.74       | 15.9                             | 19.1      | -0.62       |
| Liverpool                       | 53.4                     | 61.3        | -1.55        | 26.7                         | 32.8        | -1.59       | 18.3                             | 24.3      | -1.74       |
| Manchester                      | 68.3                     | 67.4        | 0.24         | 42.1                         | 43.9        | -0.52       | 25.7                             | 28.2      | -0.83       |
| North Lancashire                | 68.6                     | 69.3        | -0.12        | 37.6                         | 37.8        | -0.07       | 30.5                             | 28.7      | 0.3         |
| Oldham                          | 66.2                     | 63.9        | 0.38         | 34.1                         | 36.2        | -0.44       | 20.3                             | 24.6      | -0.98       |
| Salford                         | 64.2                     | 58.8        | 0.94         | 34.3                         | 30.5        | 0.72        | 29.9                             | 22.5      | 1.58        |
| Sefton                          | <b>55.8</b>              | <b>68.9</b> | <b>-2.17</b> | 27.1                         | 36.1        | -1.58       | 23                               | 27.9      | -0.97       |
| Stockport                       | 73.2                     | 74.2        | -0.2         | 46.9                         | 44.7        | 0.36        | 35.9                             | 33.5      | 0.41        |
| Tameside and Glossop            | 61.2                     | 64          | -0.47        | 35.6                         | 33.9        | 0.22        | 25                               | 25.3      | -0.1        |
| Trafford                        | 76.6                     | 80.2        | -0.7         | 50.1                         | 55.4        | -0.95       | 37.1                             | 40.7      | -0.69       |
| Warrington                      | 60.8                     | 71.8        | -1.77        | 34.2                         | 40.4        | -1.03       | 24.6                             | 31.2      | -1.2        |
| Western Cheshire                | 69.5                     | 74.9        | -0.92        | 35.2                         | 44.4        | -1.09       | 24.9                             | 34.6      | -1.23       |
| Wirral                          | 55                       | 65.5        | -1.7         | 29.9                         | 34.3        | -0.93       | 20.2                             | 26.8      | -1.52       |
| <b>YORKSHIRE AND THE HUMBER</b> |                          |             |              |                              |             |             |                                  |           |             |
| Barnsley                        | 62.5                     | 58.6        | 0.63         | 30.8                         | 27.5        | 0.51        | 24.8                             | 21.7      | 0.5         |
| Bradford and Airedale           | 69.7                     | 64.6        | 1.42         | 39.7                         | 40.4        | -0.25       | 26.3                             | 25.9      | 0.07        |
| Calderdale                      | 78.4                     | 71.5        | 1.14         | 40.5                         | 41.1        | -0.14       | 31.6                             | 29.9      | 0.24        |
| Doncaster                       | 63.9                     | 58.9        | 0.91         | 29.6                         | 28.1        | 0.27        | 21.1                             | 21.7      | -0.22       |
| East Riding Of Yorkshire        | 70.4                     | 72.1        | -0.3         | 42.2                         | 42.1        | -0.02       | 33.2                             | 31.6      | 0.22        |
| Hull                            | 57.2                     | 51.1        | 1.09         | 30.6                         | 23.5        | 1.58        | 23.1                             | 17.8      | 1.29        |
| Kirklees                        | 73.8                     | 70.2        | 0.85         | 40.7                         | 41.4        | -0.19       | 26.9                             | 28.1      | -0.37       |
| Leeds                           | 72.2                     | 68.9        | 1.05         | <b>48.8</b>                  | <b>41.1</b> | <b>2.51</b> | <b>37.3</b>                      | <b>29</b> | <b>2.95</b> |
| North East Lincolnshire         | 55.5                     | 54.9        | 0.08         | 22.2                         | 24.7        | -0.45       | 17.6                             | 19.2      | -0.37       |
| North Lincolnshire              | 58.6                     | 60.4        | -0.22        | 33.2                         | 28          | 0.74        | 26.5                             | 21.2      | 0.83        |
| North Yorkshire and York        | 73.6                     | 73.5        | 0.05         | -                            | -           | -           | -                                | -         | -           |
| Rotherham                       | 60.1                     | 58.9        | 0.19         | 29.3                         | 28.3        | 0.15        | 22.6                             | 21.7      | 0.12        |

| PRIMARY CARE TRUST                | BREASTFEEDING INITIATION |             |              | ANY BREASTFEEDING AT 6-8 WKS |             |              | EXCL. BREASTFEEDING AT 6-8 WEEKS |             |             |
|-----------------------------------|--------------------------|-------------|--------------|------------------------------|-------------|--------------|----------------------------------|-------------|-------------|
|                                   | O                        | P           | SR           | O                            | P           | SR           | O                                | P           | SR          |
| Sheffield                         | <b>77.6</b>              | <b>69.5</b> | <b>2.06</b>  | <b>51.4</b>                  | <b>41.7</b> | <b>2.44</b>  | <b>37.7</b>                      | <b>29.6</b> | <b>2.22</b> |
| Wakefield District                | 60.6                     | 59.4        | 0.22         | 34.5                         | 28.7        | 1.28         | 28.3                             | 22.1        | 1.48        |
| <b>EAST MIDLANDS</b>              |                          |             |              |                              |             |              |                                  |             |             |
| Bassetlaw                         | 68.9                     | 66.8        | 0.2          | 36.1                         | 33.8        | 0.23         | 28.4                             | 26.1        | 0.23        |
| Derby City                        | 71.8                     | 70          | 0.34         | 38.3                         | 41.1        | -0.59        | 27.9                             | 28          | -0.06       |
| Derbyshire County                 | 72.8                     | 70.4        | 0.66         | 42.4                         | 38.5        | 1.04         | 35.7                             | 29.9        | 1.7         |
| Leicester City                    | 73.6                     | 70.4        | 0.74         | 50.9                         | 50.4        | 0.08         | 31.9                             | 30.3        | 0.35        |
| Leicestershire County and Rutland | 72.8                     | 74.7        | -0.52        | 43.1                         | 46.9        | -1.05        | 32.9                             | 34.1        | -0.38       |
| Lincolnshire                      | 72.1                     | 66.8        | 1.45         | 38.9                         | 34.8        | 1.17         | 29.6                             | 26.5        | 0.93        |
| Northamptonshire                  | 75.9                     | 72.6        | 1.03         | 44.3                         | 43.3        | 0.25         | 33.4                             | 31.5        | 0.57        |
| Nottingham City                   | 68.9                     | 64.5        | 0.91         | 45.9                         | 39.2        | 1.42         | 32.8                             | 26          | 1.6         |
| Nottinghamshire County            | 71.8                     | 71.5        | 0.08         | 37.7                         | 40.5        | -0.81        | 28.8                             | 30.8        | -0.68       |
| <b>WEST MIDLANDS</b>              |                          |             |              |                              |             |              |                                  |             |             |
| Birmingham East and North         | 65.2                     | 66.5        | -0.32        | 41.8                         | 42.1        | -0.14        | 26.7                             | 27.6        | -0.31       |
| Coventry Teaching                 | 75                       | 69.8        | 1.11         | 38.1                         | 44.7        | -1.49        | 24.6                             | 29.3        | -1.19       |
| Dudley                            | <b>52.2</b>              | <b>66.9</b> | <b>-2.74</b> | 28.7                         | 35.4        | -1.38        | 18.2                             | 25.8        | -1.73       |
| Heart Of Birmingham Teaching      | 72.3                     | 79.5        | -1.91        | -                            | -           | -            | -                                | -           | -           |
| Herefordshire                     | -                        | -           | -            | -                            | -           | -            | -                                | -           | -           |
| North Staffordshire               | 67.2                     | 67.9        | -0.1         | 39.9                         | 35.7        | 0.48         | 31.4                             | 27.6        | 0.47        |
| Sandwell                          | 56.5                     | 62.9        | -1.31        | 29.5                         | 37.8        | -1.89        | 18.5                             | 24.7        | -1.65       |
| Shropshire County                 | 74                       | 73.4        | 0.11         | 42.2                         | 42.2        | -0.04        | 33.2                             | 33          | -0.02       |
| Solihull Care Trust               | 69.2                     | 76.1        | -1.19        | 41.3                         | 48.3        | -0.97        | 31.2                             | 35.5        | -0.66       |
| South Birmingham                  | 68.9                     | 67.7        | 0.26         | 44.1                         | 42.3        | 0.35         | 28.6                             | 28.9        | -0.13       |
| South Staffordshire               | 65.8                     | 70.1        | -1.1         | 33.3                         | 38.5        | -1.41        | 23.7                             | 29.4        | -1.67       |
| Stoke On Trent                    | 60.8                     | 53.9        | 1.09         | 32.3                         | 25.5        | 1.45         | 22.8                             | 19.5        | 0.75        |
| Telford and Wrekin                | 65.1                     | 66.3        | -0.17        | 33.2                         | 34.4        | -0.23        | 23.5                             | 25.4        | -0.38       |
| Walsall Teaching                  | 54.8                     | 58.8        | -0.7         | 30.6                         | 31.8        | -0.29        | 17.9                             | 22.2        | -1.05       |
| Warwickshire                      | 71.4                     | 74.3        | -0.77        | 41.9                         | 46.4        | -1.14        | 29.4                             | 33.7        | -1.18       |
| Wolverhampton City                | 65.2                     | 64          | 0.22         | 36                           | 39.3        | -0.67        | 23.1                             | 25.5        | -0.57       |
| Worcestershire                    | 73.9                     | 73.7        | 0.07         | 41.5                         | 43.3        | -0.49        | 31.9                             | 33.1        | -0.38       |
| <b>EAST OF ENGLAND</b>            |                          |             |              |                              |             |              |                                  |             |             |
| Bedfordshire                      | 75.4                     | 76.1        | -0.16        | 45.2                         | 50.3        | -1.21        | 32.9                             | 35.4        | -0.64       |
| Cambridgeshire                    | 80.9                     | 77          | 1.14         | 57.1                         | 51          | 1.34         | 43.8                             | 36.7        | 1.64        |
| Great Yarmouth and Waveney        | 63.7                     | 64.8        | -0.17        | 37.1                         | 32.4        | 0.7          | 29.1                             | 24.3        | 0.79        |
| Hertfordshire                     | -                        | -           | -            | -                            | -           | -            | -                                | -           | -           |
| Luton                             | 66.4                     | 75.4        | -1.79        | 56.1                         | 56.3        | -0.07        | 32.7                             | 34          | -0.32       |
| Mid Essex                         | 71.6                     | 75.3        | -0.82        | 43.7                         | 47.5        | -0.74        | 32.2                             | 34.9        | -0.6        |
| Norfolk                           | 75.6                     | 71.8        | 1.06         | 43.8                         | 41.2        | 0.7          | 32.6                             | 31.1        | 0.39        |
| North East Essex                  | 72.9                     | 69.8        | 0.58         | 42.9                         | 39.7        | 0.58         | 31.6                             | 28.9        | 0.52        |
| Peterborough                      | 65.1                     | 69.4        | -0.65        | 43.8                         | 40.6        | 0.44         | 29.3                             | 27.4        | 0.26        |
| South East Essex                  | 73.3                     | 74          | -0.16        | 37.3                         | 44.6        | -1.38        | 25.5                             | 33.3        | -1.6        |
| South West Essex                  | 67.7                     | 73          | -1.28        | -                            | -           | -            | -                                | -           | -           |
| Suffolk                           | 71.8                     | 72.5        | -0.18        | 46.3                         | 44          | 0.55         | 36.4                             | 31.7        | 1.24        |
| West Essex                        | -                        | -           | -            | -                            | -           | -            | -                                | -           | -           |
| <b>LONDON</b>                     |                          |             |              |                              |             |              |                                  |             |             |
| Barking and Dagenham              | 70.7                     | 75.9        | -1.34        | 48.6                         | 52.8        | -0.61        | 20.5                             | 27.6        | -1.16       |
| Barnet                            | 91.2                     | 87.9        | 1.54         | 72.8                         | 69.6        | 0.87         | 42.9                             | 42.3        | 0.09        |
| Bexley Care Trust                 | 73.4                     | 74          | -0.08        | 50.1                         | 46.5        | 0.7          | 35.6                             | 30.1        | 1.04        |
| Brent Teaching                    | 85.5                     | 89.5        | -1.84        | <b>71.4</b>                  | <b>78.9</b> | <b>-2.39</b> | 41.1                             | 41.8        | -0.2        |
| Bromley                           | 83                       | 83.4        | -0.07        | 52.8                         | 58          | -1.21        | 34.7                             | 41.9        | -1.65       |
| Camden                            | 90.4                     | 91.1        | -0.21        | 74.2                         | 77          | -0.63        | 48.4                             | 47.7        | 0.1         |
| City and Hackney Teaching         | 92.1                     | 88.8        | 1.44         | 80.1                         | 73.8        | 1.81         | <b>50</b>                        | <b>40</b>   | <b>2.37</b> |
| Croydon                           | 85.9                     | 81.9        | 1.57         | 67.3                         | 64.3        | 0.87         | 37.1                             | 35          | 0.54        |

| PRIMARY CARE TRUST           | BREASTFEEDING INITIATION |             |             | ANY BREASTFEEDING AT 6-8 WKS |             |             | EXCL. BREASTFEEDING AT 6-8 WEEKS |             |             |
|------------------------------|--------------------------|-------------|-------------|------------------------------|-------------|-------------|----------------------------------|-------------|-------------|
|                              | O                        | P           | SR          | O                            | P           | SR          | O                                | P           | SR          |
| Ealing                       | -                        | -           | -           | -                            | -           | -           | -                                | -           | -           |
| Enfield                      | 90.3                     | 86.7        | 1.56        | 64.6                         | 66.8        | -0.48       | 34.6                             | 38.6        | -0.86       |
| Greenwich Teaching           | 79.8                     | 82.3        | -0.76       | 61.9                         | 59.5        | 0.6         | 37.4                             | 32.8        | 1.07        |
| Hammersmith and Fulham       | 91.9                     | 92.4        | -0.11       | 82.2                         | 74.7        | 1.66        | 51.5                             | 49.5        | 0.32        |
| Haringey Teaching            | 92.3                     | 90.4        | 0.91        | 72.3                         | 76.3        | -0.94       | 44                               | 42.6        | 0.22        |
| Harrow                       | 84.9                     | 84          | 0.32        | 69.2                         | 72.1        | -0.52       | 45.1                             | 40.4        | 0.73        |
| Havering                     | 67.7                     | 70.3        | -0.53       | 38.1                         | 41.2        | -0.52       | 23.3                             | 27.7        | -0.83       |
| Hillingdon                   | 77.3                     | 78.7        | -0.36       | 55.9                         | 57.9        | -0.45       | 31.6                             | 32.7        | -0.27       |
| Hounslow                     | 85.6                     | 83          | 0.96        | 64.1                         | 65.6        | -0.3        | 42.2                             | 35.3        | 1.36        |
| Islington                    | 88.7                     | 89.2        | -0.12       | 73.2                         | 74.8        | -0.33       | 48.9                             | 42.3        | 1.19        |
| Kensington and Chelsea       | -                        | -           | -           | -                            | -           | -           | -                                | -           | -           |
| Kingston                     | 91.5                     | 87          | 1.38        | 72.1                         | 66.7        | 1.09        | 49.9                             | 46.2        | 0.6         |
| Lambeth                      | 92.9                     | 92.4        | 0.25        | -                            | -           | -           | -                                | -           | -           |
| Lewisham                     | 88.4                     | 90          | -0.62       | 74.6                         | 71.1        | 0.98        | 47                               | 41.7        | 1.21        |
| Newham                       | 84.3                     | 87.4        | -1.38       | -                            | -           | -           | -                                | -           | -           |
| Redbridge                    | 83.1                     | 84.8        | -0.45       | 67                           | 68.1        | -0.25       | 32.3                             | 37.5        | -1.17       |
| Richmond and Twickenham      | 91.3                     | 92.5        | -0.43       | 71.3                         | 78          | -1.55       | 49.6                             | 57.4        | -1.46       |
| Southwark                    | 90.5                     | 89.8        | 0.37        | 75.3                         | 72.6        | 0.8         | 42.8                             | 43.6        | -0.21       |
| Sutton and Merton            | 79.9                     | 84.5        | -1.87       | 61                           | 61.6        | -0.16       | 39.1                             | 41.9        | -0.79       |
| Tower Hamlets                | 88.9                     | 88.2        | 0.35        | 71.7                         | 67.6        | 1           | 32.1                             | 36.8        | -1.09       |
| Waltham Forest               | 89.3                     | 87.6        | 0.71        | 66.5                         | 68.8        | -0.53       | 35.2                             | 37.5        | -0.53       |
| Wandsworth                   | 92.2                     | 92.1        | 0.1         | 72                           | 73.8        | -0.44       | 46                               | 49.9        | -0.88       |
| Westminster                  | 89.2                     | 92.8        | -1.29       | 83.1                         | 79.2        | 0.94        | 52.4                             | 50.8        | 0.25        |
| <b>SOUTH EAST COAST</b>      |                          |             |             |                              |             |             |                                  |             |             |
| Brighton and Hove City       | 85.5                     | 83.3        | 0.49        | 70.5                         | 62.2        | 1.47        | 58.2                             | 47.1        | 1.95        |
| E Sussex Downs and Weald     | 80.9                     | 75.8        | 1.01        | 49.3                         | 46.6        | 0.45        | 36.5                             | 35.4        | 0.17        |
| Eastern and Coastal Kent     | 70.7                     | 68.4        | 0.67        | -                            | -           | -           | -                                | -           | -           |
| Hastings and Rother          | 76.3                     | 68          | 1.14        | 43.2                         | 38.3        | 0.66        | 30.9                             | 28.6        | 0.3         |
| Medway                       | 67.9                     | 66.3        | 0.29        | 37.9                         | 35.1        | 0.52        | 25.5                             | 25.2        | 0.01        |
| Surrey                       | 81.2                     | 83.7        | -1.15       | 56.8                         | 62.6        | -1.59       | 39.9                             | 46.6        | -1.82       |
| West Kent                    | 71.9                     | 75.4        | -1.07       | -                            | -           | -           | -                                | -           | -           |
| West Sussex                  | -                        | -           | -           | -                            | -           | -           | -                                | -           | -           |
| <b>SOUTH CENTRAL</b>         |                          |             |             |                              |             |             |                                  |             |             |
| Berkshire East               | 81.2                     | 80          | 0.33        | 54.8                         | 59.2        | -0.98       | 37.2                             | 39.8        | -0.63       |
| Berkshire West               | 77.9                     | 80.5        | -0.77       | 55.1                         | 57.4        | -0.55       | 38.4                             | 41.3        | -0.73       |
| Buckinghamshire              | 80.2                     | 83          | -0.85       | 56.3                         | 61.4        | -1.36       | 40                               | 45.3        | -1.42       |
| Hampshire                    | <b>79.9</b>              | <b>74.5</b> | <b>2.15</b> | 45.5                         | 45.9        | -0.19       | 31.8                             | 34.2        | -1          |
| Isle Of Wight NHS            | 81.1                     | 68          | 1.45        | 44.6                         | 35.7        | 0.96        | 31                               | 26.9        | 0.45        |
| Milton Keynes                | 75.4                     | 74.1        | 0.27        | 55.9                         | 48.3        | 1.46        | 34.6                             | 32.9        | 0.31        |
| Oxfordshire                  | 78.3                     | 80.4        | -0.69       | 59.8                         | 56.4        | 0.92        | 45                               | 41.2        | 1.05        |
| Portsmouth City Teaching     | 75.4                     | 69.3        | 1           | 43.6                         | 39.1        | 0.7         | 32.8                             | 27.6        | 0.91        |
| Southampton City             | 74.6                     | 69.9        | 0.89        | 44.6                         | 40.7        | 0.59        | 30.1                             | 28          | 0.33        |
| <b>SOUTH WEST</b>            |                          |             |             |                              |             |             |                                  |             |             |
| Bath and NE Somerset         | -                        | -           | -           | -                            | -           | -           | -                                | -           | -           |
| Bournemouth and Poole        | 76.2                     | 72.4        | 0.67        | 50.7                         | 42.4        | 1.63        | 35                               | 31.6        | 0.68        |
| Bristol                      | 79.3                     | 76.9        | 0.67        | 54.3                         | 50.2        | 0.99        | 37.5                             | 35.3        | 0.53        |
| Cornwall and Isles Of Scilly | 78.8                     | 71          | 1.85        | 44.4                         | 38.8        | 1.29        | 33.8                             | 29.8        | 0.97        |
| Devon                        | 75.9                     | 73.4        | 0.7         | <b>51.1</b>                  | <b>42.6</b> | <b>2.22</b> | <b>41.3</b>                      | <b>32.9</b> | <b>2.33</b> |
| Dorset                       | 76.4                     | 73.7        | 0.51        | 54                           | 44.3        | 1.75        | 42.7                             | 33.4        | 1.79        |
| Gloucestershire              | 75.8                     | 73.7        | 0.56        | 49                           | 45          | 0.99        | 37.2                             | 33.2        | 1.05        |
| North Somerset               | 78                       | 74.2        | 0.58        | 48.7                         | 45.2        | 0.49        | 35.3                             | 33.9        | 0.16        |
| Plymouth Teaching            | 68.8                     | 68.8        | -0.01       | 35                           | 36.9        | -0.4        | 25.5                             | 27.6        | -0.5        |
| Somerset                     | <b>79.7</b>              | <b>71.1</b> | <b>2.07</b> | 48                           | 39.6        | 1.98        | 38.4                             | 30.5        | 1.97        |

| PRIMARY CARE TRUST    | BREASTFEEDING INITIATION |      |      | ANY BREASTFEEDING AT 6-8 WKS |      |       | EXCL. BREASTFEEDING AT 6-8 WEEKS |      |       |
|-----------------------|--------------------------|------|------|------------------------------|------|-------|----------------------------------|------|-------|
|                       | O                        | P    | SR   | O                            | P    | SR    | O                                | P    | SR    |
| South Gloucestershire | 77                       | 72.5 | 0.79 | 43.5                         | 43.2 | 0.01  | 31.1                             | 32   | -0.23 |
| Swindon               | 75.9                     | 72.7 | 0.56 | 40.3                         | 43.7 | -0.45 | 27.9                             | 31.6 | -0.55 |
| Torbay Care Trust     | 68.6                     | 64.1 | 0.52 | 35.9                         | 33.3 | 0.25  | 25.3                             | 25.5 | -0.09 |
| Wiltshire             | 80.3                     | 74.2 | 1.47 | 49.9                         | 45.1 | 0.96  | 37.1                             | 33.8 | 0.68  |

O = observed percentage (%), P = predicted percentage (%), SR = standardised residuals (number of)

N.B. Observed figures presented in this table may differ slightly from DH annual outturn percentages, as we used quarterly actual data in our calculations.
